# Supplementary material
Source: PubMed Central journal article supplement (PMC4468488)
Supplement: JVI.00115-15_zjv999090481so1.pdf [file JVI.00115-15_zjv999090481so1.pdf]

1

## SUPPLEMENTAL INFORMATION

### 2 SUPPLEMENTAL TABLES

#### 3 Supplemental Table S1. Description of the gene complement of the Faustovirus E12 isolate genome.

| ORF number           | ORF coordinates          | Predicted protein length (amino acids) | Detection by proteomics | GenBank identifier of the first BLAST hit | Identity of the first BLAST hit in GenBank_nr (completed annotation)   | Organism corresponding to the first BLAST hit in GenBank_nr | e-value  | Percentage of identity (%) |
|----------------------|--------------------------|----------------------------------------|-------------------------|-------------------------------------------|------------------------------------------------------------------------|-------------------------------------------------------------|----------|----------------------------|
| 4<br>Faustovirus_001 | complement(513..1478)    | 322                                    | Yes                     | 738376820                                 | Hypothetical protein, partial ( putative Hef-like homing endonuclease) | Mollicutes bacterium HR2                                    | 1,00E-04 | 34                         |
| Faustovirus_002      | complement(1594..2130)   | 179                                    | Yes                     |                                           |                                                                        |                                                             |          |                            |
| Faustovirus_003      | complement(2171..2539)   | 123                                    |                         |                                           |                                                                        |                                                             |          |                            |
| Faustovirus_004      | complement(2587..3159)   | 191                                    |                         | 421960576                                 | Putative exported 24-amino acid repeat protein                         | Campylobacter showae CSUNSWCD                               | 8,00E-09 | 28                         |
| Faustovirus_005      | complement(3181..3783)   | 201                                    |                         | 652357991                                 | Hypothetical protein (MORN repeat-containing protein)                  | Sediminibacter sp. Hel_I_10                                 | 4,00E-14 | 32                         |
| Faustovirus_006      | complement(3846..4247)   | 134                                    |                         |                                           |                                                                        |                                                             |          |                            |
| Faustovirus_007      | complement(4435..5091)   | 219                                    |                         |                                           |                                                                        |                                                             |          |                            |
| Faustovirus_008      | complement(5148..5726)   | 193                                    |                         |                                           |                                                                        |                                                             |          |                            |
| Faustovirus_009      | complement(5814..6347)   | 178                                    | Yes                     | *                                         |                                                                        |                                                             |          |                            |
| Faustovirus_010      | complement(6464..7081)   | 206                                    | Yes                     |                                           |                                                                        |                                                             |          |                            |
| Faustovirus_011      | complement(7355..7810)   | 152                                    |                         |                                           |                                                                        |                                                             |          |                            |
| Faustovirus_012      | complement(7897..8340)   | 148                                    |                         |                                           |                                                                        |                                                             |          |                            |
| Faustovirus_013      | complement(8361..8999)   | 213                                    |                         |                                           |                                                                        |                                                             |          |                            |
| Faustovirus_014      | complement(9069..9725)   | 219                                    |                         | 518484612                                 | Hypothetical protein (MORN repeat-containing protein)                  | Variovorax paradoxus                                        | 6,00E-08 | 30                         |
| Faustovirus_015      | complement(9783..10265)  | 161                                    |                         |                                           |                                                                        |                                                             |          |                            |
| Faustovirus_016      | 10662..11174             | 171                                    |                         |                                           |                                                                        |                                                             |          |                            |
| Faustovirus_017      | complement(11314..15477) | 1388                                   |                         | 363539884                                 | mg675 gene product (DNA repair exonuclease)                            | Megavirus chiliensis                                        | 2,00E-39 | 25                         |
| Faustovirus_018      | 15594..16271             | 226                                    |                         |                                           |                                                                        |                                                             |          |                            |
| Faustovirus_019      | 16580..16990             | 137                                    |                         |                                           |                                                                        |                                                             |          |                            |
| Faustovirus_020      | complement(17000..18220) | 407                                    |                         | 299472065                                 | EsV-1-7 (Partial) (Zn-finger-containing protein)                       | Ectocarpus siliculosus                                      | 6,00E-04 | 31                         |
| Faustovirus_021      | 18591..20690             | 700                                    | Yes                     | 593791112                                 | PHAVU_002G165800g (AAA family ATPase)                                  | Phaseolus vulgaris                                          | 2,00E-26 | 39                         |
| Faustovirus_022      | 20814..22421             | 536                                    |                         | 300122679                                 | Unnamed protein product (Hypothetical protein)                         | Blastocystis hominis                                        | 7,00E-04 | 54                         |

5

6 **Supplemental Table S1.** (continued)

| ORF number      | ORF coordinates          | Predicted protein length (amino acids) | Detection by proteomics | GenBank identifier of the first BLAST hit | Identity of the first BLAST hit in GenBank_nr (completed annotation) | Organism corresponding to the first BLAST hit in GenBank_nr           | e-value                                         | Percentage of identity (%) |    |
|-----------------|--------------------------|----------------------------------------|-------------------------|-------------------------------------------|----------------------------------------------------------------------|-----------------------------------------------------------------------|-------------------------------------------------|----------------------------|----|
| 7               |                          |                                        |                         |                                           |                                                                      |                                                                       |                                                 |                            |    |
| Faustovirus_023 | complement(22448..23155) | 236                                    |                         |                                           |                                                                      |                                                                       |                                                 |                            |    |
| Faustovirus_024 | 23486..24037             | 184                                    |                         |                                           |                                                                      |                                                                       |                                                 |                            |    |
| Faustovirus_025 | complement(24053..25720) | 556                                    |                         |                                           |                                                                      |                                                                       |                                                 |                            |    |
| Faustovirus_026 | complement(25783..26445) | 221                                    |                         |                                           |                                                                      |                                                                       |                                                 |                            |    |
| Faustovirus_027 | 26559..28115             | 519                                    |                         | 218199724                                 | Hypothetical protein OsI_26209 (AAA family ATPase)                   | Oryza sativa Indica Group                                             | 1,00E-16                                        | 34                         |    |
| Faustovirus_028 | 28196..29869             | 558                                    |                         | 218199723                                 | Hypothetical protein OsI_26207 (AAA family ATPase)                   | Oryza sativa Indica Group                                             | 2,00E-15                                        | 26                         |    |
| Faustovirus_029 | complement(29862..30260) | 133                                    | Yes                     | 131579                                    | Puff II/9-1 protein; Flags: Precursor                                | Bradysia coprophila                                                   | 3,00E-03                                        | 37                         |    |
| Faustovirus_030 | complement(30344..33787) | 1148                                   |                         | 321444493                                 | Hypothetical protein DAPPUDRAFT_124236                               | Daphnia pulex                                                         | 5,00E-41                                        | 33                         |    |
| Faustovirus_031 | complement(33972..34886) | 305                                    |                         | 493608916                                 | Hypothetical protein                                                 | Oscillochloris trichoides                                             | 5,00E-04                                        | 47                         |    |
| Faustovirus_032 | 34994..35665             | 224                                    | Yes                     |                                           |                                                                      |                                                                       |                                                 |                            |    |
| Faustovirus_033 | complement(35662..36462) | 267                                    |                         | 593778002                                 | gp559 (putative Tryptophan repeat gene family protein)               | Bacillus phage G                                                      | 6,00E-15                                        | 25                         |    |
| Faustovirus_034 | complement(36497..37093) | 199                                    |                         |                                           |                                                                      |                                                                       |                                                 |                            |    |
| Faustovirus_035 | 37193..37612             | 140                                    | Yes                     |                                           |                                                                      |                                                                       |                                                 |                            |    |
| Faustovirus_036 | 37640..39076             | 479                                    | Yes                     | *                                         | 322510730                                                            | Putative deoxyribodipyrimidine photolyase                             | Organic Lake phycodnavirus 1                    | 3,00E-69                   | 32 |
| Faustovirus_037 | 39156..39656             | 167                                    |                         |                                           |                                                                      |                                                                       |                                                 |                            |    |
| Faustovirus_038 | 39689..40330             | 214                                    | Yes                     | *                                         | 495395246                                                            | Deoxyuridine 5'-triphosphate nucleotidohydrolase                      | Bacteroides pectinophilus CAG:437               | 5,00E-26                   | 45 |
| Faustovirus_039 | 40551..41585             | 349                                    |                         |                                           |                                                                      |                                                                       |                                                 |                            |    |
| Faustovirus_040 | complement(41597..43564) | 656                                    | Yes                     | *                                         | 353238251                                                            | Related to ankyrin repeat-containing protein-Dictyostelium discoideum | Piriformospora indica DSM 11827                 | 4,00E-05                   | 32 |
| Faustovirus_041 | complement(43960..44334) | 125                                    |                         |                                           |                                                                      |                                                                       |                                                 |                            |    |
| Faustovirus_042 | 44491..48216             | 1242                                   | Yes                     | *                                         | 218547416                                                            | DNA-directed RNA polymerase subunit 2                                 | African swine fever virus pig/Kenya/KEN-50/1950 | 0,00E+00                   | 41 |
| Faustovirus_043 | 48974..50614             | 547                                    |                         |                                           |                                                                      |                                                                       |                                                 |                            |    |
| Faustovirus_044 | 50649..50912             | 88                                     | Yes                     | *                                         | 470291948                                                            | Glutaredoxin-C3                                                       | Capsaspora owczarzaki ATCC 30864                | 3,00E-21                   | 48 |
| Faustovirus_045 | complement(51064..51921) | 286                                    |                         |                                           |                                                                      |                                                                       |                                                 |                            |    |
| Faustovirus_046 | complement(52015..55140) | 1042                                   | Yes                     | *                                         | 291335991                                                            | Possible T4-like proximal tail fiber                                  | uncultured phage MedDCM-OCT-S09-C5              | 9,00E-95                   | 42 |
| Faustovirus_047 | complement(55247..56002) | 252                                    |                         |                                           |                                                                      |                                                                       |                                                 |                            |    |
| Faustovirus_048 | complement(56103..57017) | 305                                    | Yes                     | *                                         | 547865682                                                            | Phosphatidylglycerophosphate synthase                                 | Eubacterium siraeum CAG:80                      | 8,00E-04                   | 31 |

8

9 **Supplemental Table S1.** (continued)

| ORF number      | ORF coordinates          | Predicted protein length (amino acids) | Detection by proteomics | GenBank identifier of the first BLAST hit | Identity of the first BLAST hit in GenBank_nr (completed annotation) | Organism corresponding to the first BLAST hit in GenBank_nr | e-value                              | Percentage of identity (%) |    |
|-----------------|--------------------------|----------------------------------------|-------------------------|-------------------------------------------|----------------------------------------------------------------------|-------------------------------------------------------------|--------------------------------------|----------------------------|----|
| 10              |                          |                                        |                         |                                           |                                                                      |                                                             |                                      |                            |    |
| Faustovirus_049 | complement(57141..57521) | 127                                    | Yes                     |                                           |                                                                      |                                                             |                                      |                            |    |
| Faustovirus_050 | complement(57557..58021) | 155                                    |                         |                                           |                                                                      |                                                             |                                      |                            |    |
| Faustovirus_051 | complement(58087..58848) | 254                                    |                         |                                           |                                                                      |                                                             |                                      |                            |    |
| Faustovirus_052 | complement(58897..59382) | 162                                    |                         |                                           |                                                                      |                                                             |                                      |                            |    |
| Faustovirus_053 | 59476..62331             | 952                                    | Yes                     | 685073826                                 | Glycosyl hydrolase family 81                                         | Chlamydia sp. 'Rubis'                                       | 3,00E-153                            | 36                         |    |
| Faustovirus_054 | 62766..63797             | 344                                    |                         |                                           |                                                                      |                                                             |                                      |                            |    |
| Faustovirus_055 | 63891..64241             | 117                                    | Yes                     | *                                         |                                                                      |                                                             |                                      |                            |    |
| Faustovirus_056 | 64548..65009             | 154                                    |                         |                                           |                                                                      |                                                             |                                      |                            |    |
| Faustovirus_057 | complement(65045..65353) | 103                                    |                         |                                           |                                                                      |                                                             |                                      |                            |    |
| Faustovirus_058 | 65470..65997             | 176                                    | Yes                     |                                           |                                                                      |                                                             |                                      |                            |    |
| Faustovirus_059 | 66153..66863             | 237                                    |                         | 628347862                                 | Ubiquitin-conjugating enzyme E2 J1                                   | Cladophialophora psammophila CBS 110553                     | 2,00E-13                             | 25                         |    |
| Faustovirus_060 | complement(66888..68294) | 469                                    | Yes                     | *                                         | 162849262                                                            | pK421R                                                      | African swine fever virus Benin 97/1 | 4,00E-15                   | 23 |
| Faustovirus_061 | complement(68388..68975) | 196                                    | Yes                     | *                                         |                                                                      |                                                             |                                      |                            |    |
| Faustovirus_062 | 69391..72882             | 1164                                   | Yes                     | *                                         | 652629697                                                            | Ribonucleoside-diphosphate reductase                        | Flexibacter elegans                  | 6,00E-173                  | 47 |
| Faustovirus_063 | 73070..74098             | 343                                    | Yes                     |                                           | 397531943                                                            | Ribonucleotide reductase small subunit p53R2ii              | Carassius carassius                  | 1,00E-90                   | 47 |
| Faustovirus_064 | 74439..74813             | 125                                    |                         |                                           |                                                                      |                                                             |                                      |                            |    |
| Faustovirus_065 | complement(74846..75352) | 169                                    |                         |                                           |                                                                      |                                                             |                                      |                            |    |
| Faustovirus_066 | complement(75533..76135) | 201                                    | Yes                     |                                           |                                                                      |                                                             |                                      |                            |    |
| Faustovirus_067 | complement(76157..76672) | 172                                    |                         |                                           |                                                                      |                                                             |                                      |                            |    |
| Faustovirus_068 | complement(76748..78262) | 505                                    |                         | 358338692                                 | BTB/POZ domain-containing protein 9                                  | Clonorchis sinensis                                         | 1,00E-04                             | 26                         |    |
| Faustovirus_069 | 78367..79353             | 329                                    |                         |                                           |                                                                      |                                                             |                                      |                            |    |
| Faustovirus_070 | 79451..80383             | 311                                    |                         | 145344561                                 | Predicted protein (ankyrin repeat-containing protein)                | Ostreococcus lucimarinus CCE9901                            | 3,00E-13                             | 31                         |    |
| Faustovirus_071 | 80496..83777             | 1094                                   |                         | 162849430                                 | Helicase                                                             | African swine fever virus OURT 88/3                         | 1,00E-111                            | 31                         |    |
| Faustovirus_072 | 84093..84983             | 297                                    |                         |                                           |                                                                      |                                                             |                                      |                            |    |
| Faustovirus_073 | complement(85041..85733) | 231                                    | Yes                     |                                           |                                                                      |                                                             |                                      |                            |    |
| Faustovirus_074 | complement(86015..86506) | 164                                    | Yes                     | *                                         |                                                                      |                                                             |                                      |                            |    |
| Faustovirus_075 | 86630..87223             | 198                                    | Yes                     | *                                         | 640350001                                                            | Hypothetical protein                                        | Tolumonas sp. BRL6-1                 | 3,00E-10                   | 59 |
| Faustovirus_076 | 87604..88215             | 204                                    |                         |                                           |                                                                      |                                                             |                                      |                            |    |
| Faustovirus_077 | complement(88225..89814) | 530                                    |                         |                                           |                                                                      |                                                             |                                      |                            |    |

11

12 **Supplemental Table S1.** (continued)

| ORF number      | ORF coordinates            | Predicted protein length (amino acids) | Detection by proteomics | GenBank identifier of the first BLAST hit | Identity of the first BLAST hit in GenBank_nr (completed annotation) | Organism corresponding to the first BLAST hit in GenBank_nr                              | e-value                                               | Percentage of identity (%) |    |
|-----------------|----------------------------|----------------------------------------|-------------------------|-------------------------------------------|----------------------------------------------------------------------|------------------------------------------------------------------------------------------|-------------------------------------------------------|----------------------------|----|
| 13              |                            |                                        |                         |                                           |                                                                      |                                                                                          |                                                       |                            |    |
| Faustovirus_078 | 89776..90324               | 183                                    |                         |                                           |                                                                      |                                                                                          |                                                       |                            |    |
| Faustovirus_079 | 90376..90900               | 175                                    |                         |                                           |                                                                      |                                                                                          |                                                       |                            |    |
| Faustovirus_080 | 91205..91705               | 167                                    |                         |                                           |                                                                      |                                                                                          |                                                       |                            |    |
| Faustovirus_081 | 91797..92945               | 383                                    | Yes                     | *                                         | 351737862                                                            | Putative UV damage endonuclease                                                          | Acanthamoeba castellanii mamavirus                    | 1,00E-80                   | 36 |
| Faustovirus_082 | 93033..93647               | 205                                    |                         |                                           |                                                                      |                                                                                          |                                                       |                            |    |
| Faustovirus_083 | 93747..94079               | 111                                    |                         |                                           |                                                                      |                                                                                          |                                                       |                            |    |
| Faustovirus_084 | 94143..94643               | 167                                    |                         |                                           |                                                                      |                                                                                          |                                                       |                            |    |
| Faustovirus_085 | 94694..95227               | 178                                    |                         |                                           |                                                                      |                                                                                          |                                                       |                            |    |
| Faustovirus_086 | 95307..97205               | 633                                    |                         |                                           | 340025889                                                            | Hypothetical protein                                                                     | Paramecium bursaria Chlorella virus 1                 | 9,00E-04                   | 28 |
| Faustovirus_087 | 97232..97684               | 151                                    |                         |                                           |                                                                      |                                                                                          |                                                       |                            |    |
| Faustovirus_088 | complement(97697..97912)   | 72                                     | Yes                     | *                                         |                                                                      |                                                                                          |                                                       |                            |    |
| Faustovirus_089 | 97989..98567               | 193                                    | Yes                     |                                           |                                                                      |                                                                                          |                                                       |                            |    |
| Faustovirus_090 | complement(99339..100607)  | 423                                    |                         |                                           | 157952317                                                            | Hypothetical protein NY2A_B013L                                                          | Paramecium bursaria Chlorella virus NY2A              | 2,00E-07                   | 22 |
| Faustovirus_091 | complement(100676..102358) | 561                                    |                         |                                           | 495050881                                                            | Hypothetical protein                                                                     | Rhizobium sp. CF080                                   | 8,00E-05                   | 29 |
| Faustovirus_092 | 102764..103150             | 129                                    |                         |                                           |                                                                      |                                                                                          |                                                       |                            |    |
| Faustovirus_093 | 103552..105045             | 498                                    |                         |                                           |                                                                      |                                                                                          |                                                       |                            |    |
| Faustovirus_094 | 105187..106830             | 548                                    |                         |                                           | 298711929                                                            | EsV-1-7                                                                                  | Ectocarpus siliculosus                                | 1,00E-24                   | 29 |
| Faustovirus_095 | complement(106862..107281) | 140                                    | Yes                     | *                                         | 524885705                                                            | Protein disulfide-isomerase A4-like isoform X2                                           | Aplysia californica                                   | 2,00E-09                   | 34 |
| Faustovirus_096 | complement(107361..108323) | 321                                    | Yes                     | *                                         | 268564494                                                            | C. briggsae CBR-CRN-1 protein (5'-3' exonuclease (including N-terminal domain of Poll) ) | Caenorhabditis briggsae                               | 2,00E-37                   | 34 |
| Faustovirus_097 | complement(108383..110740) | 786                                    | Yes                     | *                                         | 229890278                                                            | Putative RNA Helicase B962L                                                              | African swine fever virus warthog/Namibia/Wart80/1980 | 2,00E-99                   | 32 |
| Faustovirus_098 | complement(110812..111228) | 139                                    | Yes                     |                                           |                                                                      |                                                                                          |                                                       |                            |    |
| Faustovirus_099 | 111315..112661             | 449                                    |                         |                                           |                                                                      |                                                                                          |                                                       |                            |    |
| Faustovirus_100 | 112760..114193             | 478                                    |                         |                                           |                                                                      |                                                                                          |                                                       |                            |    |
| Faustovirus_101 | complement(114247..115017) | 257                                    | Yes                     | *                                         |                                                                      |                                                                                          |                                                       |                            |    |
| Faustovirus_102 | complement(115082..116116) | 345                                    | Yes                     |                                           | 229891468                                                            | Putative helicase/primase complex protein; Short=pF1055L                                 | African swine fever virus Malawi LIL 20/1             | 6,00E-14                   | 28 |
| Faustovirus_103 | complement(116180..117706) | 509                                    | Yes                     | *                                         | 229891413                                                            | Putative poly(A) polymerase catalytic subunit                                            | African swine fever virus Malawi LIL 20/1             | 1,00E-39                   | 38 |

14

15 **Supplemental Table S1.** (continued)

| ORF number      | ORF coordinates            | Predicted protein length (amino acids) | Detection by proteomics | GenBank identifier of the first BLAST hit | Identity of the first BLAST hit in GenBank_nr (completed annotation) | Organism corresponding to the first BLAST hit in GenBank_nr                                        | e-value  | Percentage of identity (%) |
|-----------------|----------------------------|----------------------------------------|-------------------------|-------------------------------------------|----------------------------------------------------------------------|----------------------------------------------------------------------------------------------------|----------|----------------------------|
| 16              |                            |                                        |                         |                                           |                                                                      |                                                                                                    |          |                            |
| Faustovirus_104 | complement(117790..118971) | 394                                    |                         | 229891973                                 | Uncharacterized protein C315R                                        | African swine fever virus pig/Kenya/KEN-50/1950                                                    | 3,00E-04 | 23                         |
| Faustovirus_105 | 119154..119603             | 150                                    | Yes                     | *                                         |                                                                      |                                                                                                    |          |                            |
| Faustovirus_106 | 119624..120811             | 396                                    | Yes                     | *                                         | 657394360                                                            | Kinase AFC1<br>Medicago truncatula                                                                 | 1,00E-23 | 30                         |
| Faustovirus_107 | complement(120851..121528) | 226                                    | Yes                     | *                                         |                                                                      |                                                                                                    |          |                            |
| Faustovirus_108 | complement(121651..124698) | 1016                                   |                         |                                           | 229890280                                                            | Putative helicase C962R<br>African swine fever virus tick/South Africa/Pretoriuskop Pr4/1996       | 4,00E-92 | 29                         |
| Faustovirus_109 | complement(124822..125382) | 187                                    |                         |                                           |                                                                      |                                                                                                    |          |                            |
| Faustovirus_110 | 125481..125933             | 151                                    | Yes                     | *                                         | 562972599                                                            | Subunit common to RNA polymerases I, II, and III<br>Ogataea parapolyomorpha DL-1                   | 4,00E-10 | 33                         |
| Faustovirus_111 | complement(125970..126305) | 112                                    |                         |                                           |                                                                      |                                                                                                    |          |                            |
| Faustovirus_112 | complement(126346..127134) | 263                                    | Yes                     | *                                         | 441432025                                                            | Hypothetical protein Moumou_00085<br>Acanthamoeba polyphaga moumouvirus                            | 2,00E-27 | 36                         |
| Faustovirus_113 | complement(127211..127525) | 105                                    | Yes                     | *                                         | 723456165                                                            | pC105R<br>African swine fever virus                                                                | 3,00E-12 | 32                         |
| Faustovirus_114 | 127889..128956             | 356                                    |                         |                                           |                                                                      |                                                                                                    |          |                            |
| Faustovirus_115 | 129026..130048             | 341                                    |                         |                                           |                                                                      |                                                                                                    |          |                            |
| Faustovirus_116 | complement(130085..130597) | 171                                    | Yes                     | *                                         |                                                                      |                                                                                                    |          |                            |
| Faustovirus_117 | complement(130690..132954) | 755                                    | Yes                     | *                                         | 229891938                                                            | Uncharacterized protein C717R<br>African swine fever virus Malawi LIL 20/1                         | 4,00E-50 | 24                         |
| Faustovirus_118 | 133057..133668             | 204                                    | Yes                     | *                                         | 229891826                                                            | Uncharacterized protein C129R<br>African swine fever virus Malawi LIL 20/1                         | 4,00E-06 | 32                         |
| Faustovirus_119 | complement(133711..134262) | 184                                    |                         |                                           |                                                                      |                                                                                                    |          |                            |
| Faustovirus_120 | complement(134338..135699) | 454                                    |                         |                                           |                                                                      |                                                                                                    |          |                            |
| Faustovirus_121 | 135949..136857             | 303                                    | Yes                     |                                           |                                                                      |                                                                                                    |          |                            |
| Faustovirus_122 | 137167..137982             | 272                                    |                         |                                           |                                                                      |                                                                                                    |          |                            |
| Faustovirus_123 | 138080..138922             | 281                                    |                         |                                           |                                                                      |                                                                                                    |          |                            |
| Faustovirus_124 | 139065..139949             | 295                                    |                         |                                           | 538448057                                                            | Hypothetical protein (immunoglobulin G-binding protein G)<br>Streptococcus constellatus            | 7,00E-08 | 78                         |
| Faustovirus_125 | 140246..141142             | 299                                    |                         |                                           | 7474118                                                              | Albumin-binding protein precursor - Streptococcus sp. (fragment)<br>0                              | 3,00E-11 | 80                         |
| Faustovirus_126 | complement(141223..141468) | 82                                     | Yes                     | *                                         |                                                                      |                                                                                                    |          |                            |
| Faustovirus_127 | complement(141767..143803) | 679                                    | Yes                     |                                           | 229892017                                                            | Uncharacterized protein M448R<br>African swine fever virus tick/South Africa/Pretoriuskop Pr4/1996 | 7,00E-19 | 25                         |

17

18 **Supplemental Table S1.** (continued)

| ORF number      | ORF coordinates            | Predicted protein length (amino acids) | Detection by proteomics | GenBank identifier of the first BLAST hit | Identity of the first BLAST hit in GenBank_nr (completed annotation) | Organism corresponding to the first BLAST hit in GenBank_nr | e-value  | Percentage of identity (%) |
|-----------------|----------------------------|----------------------------------------|-------------------------|-------------------------------------------|----------------------------------------------------------------------|-------------------------------------------------------------|----------|----------------------------|
| 19              |                            |                                        |                         |                                           |                                                                      |                                                             |          |                            |
| Faustovirus_128 | 144065..148183             | 1373                                   | Yes *                   | 229891898                                 | Uncharacterized protein M1249L                                       | African swine fever virus pig/Kenya/KEN-50/1950             | 8,00E-39 | 23                         |
| Faustovirus_129 | 148486..149010             | 175                                    |                         |                                           |                                                                      |                                                             |          |                            |
| Faustovirus_130 | complement(149020..150312) | 431                                    |                         | 9628167                                   | pEP364R (ERCC4 domain-containing protein)                            | African swine fever virus                                   | 5,00E-28 | 26                         |
| Faustovirus_131 | 150422..151495             | 358                                    |                         |                                           |                                                                      |                                                             |          |                            |
| Faustovirus_132 | complement(151457..152050) | 198                                    |                         |                                           |                                                                      |                                                             |          |                            |
| Faustovirus_133 | 152315..152752             | 146                                    |                         |                                           |                                                                      |                                                             |          |                            |
| Faustovirus_134 | 152812..153219             | 136                                    |                         |                                           |                                                                      |                                                             |          |                            |
| Faustovirus_135 | complement(153265..154941) | 559                                    | Yes *                   |                                           |                                                                      |                                                             |          |                            |
| Faustovirus_136 | complement(155016..155828) | 271                                    |                         |                                           |                                                                      |                                                             |          |                            |
| Faustovirus_137 | complement(155905..156666) | 254                                    |                         |                                           |                                                                      |                                                             |          |                            |
| Faustovirus_138 | complement(156751..157701) | 317                                    |                         |                                           |                                                                      |                                                             |          |                            |
| Faustovirus_139 | 158010..158807             | 266                                    |                         |                                           |                                                                      |                                                             |          |                            |
| Faustovirus_140 | complement(159159..159956) | 266                                    |                         |                                           |                                                                      |                                                             |          |                            |
| Faustovirus_141 | complement(160034..160888) | 285                                    |                         |                                           |                                                                      |                                                             |          |                            |
| Faustovirus_142 | complement(161188..161655) | 156                                    | Yes *                   |                                           |                                                                      |                                                             |          |                            |
| Faustovirus_143 | 161782..163119             | 446                                    | Yes                     |                                           |                                                                      |                                                             |          |                            |
| Faustovirus_144 | 163219..164340             | 374                                    |                         |                                           |                                                                      |                                                             |          |                            |
| Faustovirus_145 | 164380..165663             | 428                                    |                         | 229892019                                 | Uncharacterized protein B475L                                        | African swine fever virus pig/Kenya/KEN-50/1950             | 1,00E-10 | 23                         |
| Faustovirus_146 | 165725..166087             | 121                                    | Yes *                   |                                           |                                                                      |                                                             |          |                            |
| Faustovirus_147 | 166189..167259             | 357                                    | Yes                     | 229891991                                 | Uncharacterized protein B354L                                        | African swine fever virus pig/Kenya/KEN-50/1950             | 3,00E-21 | 26                         |
| Faustovirus_148 | complement(167256..168956) | 567                                    | Yes *                   | 290984181                                 | Predicted protein (Poly A polymerase regulatory subunit)             | Naegleria gruberi                                           | 4,00E-11 | 27                         |
| Faustovirus_149 | complement(169014..169247) | 78                                     | Yes                     |                                           |                                                                      |                                                             |          |                            |
| Faustovirus_150 | complement(169333..170952) | 540                                    | Yes *                   | 229891919                                 | Protein B602L                                                        | African swine fever virus pig/Kenya/KEN-50/1950             | 8,00E-37 | 26                         |
| Faustovirus_151 | 171006..172292             | 429                                    |                         | 229892000                                 | Zinc finger protein B385R                                            | African swine fever virus warthog/Namibia/Wart80/1980       | 2,00E-15 | 29                         |
| Faustovirus_152 | complement(172349..172759) | 137                                    |                         |                                           |                                                                      |                                                             |          |                            |
| Faustovirus_153 | complement(172764..173255) | 164                                    |                         |                                           |                                                                      |                                                             |          |                            |
| Faustovirus_154 | 173367..174347             | 327                                    |                         |                                           |                                                                      |                                                             |          |                            |

20

21 **Supplemental Table S1.** (continued)

| ORF number      | ORF coordinates            | Predicted protein length (amino acids) | Detection by proteomics | GenBank identifier of the first BLAST hit | Identity of the first BLAST hit in GenBank_nr (completed annotation) | Organism corresponding to the first BLAST hit in GenBank_nr                  | e-value                                         | Percentage of identity (%) |    |
|-----------------|----------------------------|----------------------------------------|-------------------------|-------------------------------------------|----------------------------------------------------------------------|------------------------------------------------------------------------------|-------------------------------------------------|----------------------------|----|
| 22              |                            |                                        |                         |                                           |                                                                      |                                                                              |                                                 |                            |    |
| Faustovirus_155 | 174732..176264             | 511                                    |                         |                                           |                                                                      |                                                                              |                                                 |                            |    |
| Faustovirus_156 | complement(176357..177013) | 219                                    | Yes                     | *                                         |                                                                      |                                                                              |                                                 |                            |    |
| Faustovirus_157 | 177744..178079             | 112                                    | Yes                     |                                           |                                                                      |                                                                              |                                                 |                            |    |
| Faustovirus_158 | 178163..181069             | 969                                    | Yes                     | *                                         | 493681319                                                            | Hypothetical protein                                                         | Microcoleus vaginatus                           | 2,00E-15                   | 26 |
| Faustovirus_159 | 181157..182875             | 573                                    |                         |                                           |                                                                      |                                                                              |                                                 |                            |    |
| Faustovirus_160 | complement(182925..183164) | 80                                     | Yes                     | *                                         |                                                                      |                                                                              |                                                 |                            |    |
| Faustovirus_161 | complement(183246..183719) | 158                                    |                         |                                           |                                                                      |                                                                              |                                                 |                            |    |
| Faustovirus_162 | 183816..184895             | 360                                    |                         |                                           |                                                                      |                                                                              |                                                 |                            |    |
| Faustovirus_163 | 184992..185186             | 65                                     | Yes                     | *                                         |                                                                      |                                                                              |                                                 |                            |    |
| Faustovirus_164 | complement(185391..186032) | 214                                    |                         |                                           | 652353374                                                            | Dihydrofolate reductase                                                      | Leptotrichia trevisanii                         | 1,00E-10                   | 30 |
| Faustovirus_165 | 186405..187700             | 432                                    |                         |                                           |                                                                      |                                                                              |                                                 |                            |    |
| Faustovirus_166 | 187852..188877             | 342                                    |                         |                                           |                                                                      |                                                                              |                                                 |                            |    |
| Faustovirus_167 | 188959..189576             | 206                                    |                         |                                           |                                                                      |                                                                              |                                                 |                            |    |
| Faustovirus_168 | 189735..190409             | 225                                    | Yes                     |                                           | 672551201                                                            | Putative RNA methylase                                                       | Aureococcus anophagefferens virus               | 1,00E-26                   | 36 |
| Faustovirus_169 | complement(190735..191751) | 339                                    |                         |                                           |                                                                      |                                                                              |                                                 |                            |    |
| Faustovirus_170 | 191867..192865             | 333                                    |                         |                                           | 503153938                                                            | MORN repeat-containing protein                                               | Ilyobacter polytropus                           | 6,00E-17                   | 29 |
| Faustovirus_171 | 192946..193686             | 247                                    |                         |                                           |                                                                      |                                                                              |                                                 |                            |    |
| Faustovirus_172 | 193802..194794             | 331                                    |                         |                                           | 492611264                                                            | Hypothetical protein (MORN repeat-containing protein)                        | Fusobacterium nucleatum                         | 2,00E-15                   | 32 |
| Faustovirus_173 | 194875..195621             | 249                                    |                         |                                           |                                                                      |                                                                              |                                                 |                            |    |
| Faustovirus_174 | 196192..196347             | 52                                     | Yes                     | *                                         | 283765127                                                            | B646L, partial (major capsid protein, partial)                               | African swine fever virus                       | 1,00E-09                   | 57 |
| Faustovirus_175 | complement(196684..197682) | 333                                    |                         |                                           |                                                                      | Intron_gpI                                                                   |                                                 |                            |    |
| Faustovirus_177 | complement(198144..198641) | 166                                    |                         |                                           |                                                                      |                                                                              |                                                 |                            |    |
| Faustovirus_178 | complement(198689..198886) | 66                                     | Yes                     |                                           |                                                                      |                                                                              |                                                 |                            |    |
| Faustovirus_179 | complement(199014..199376) | 121                                    |                         |                                           |                                                                      |                                                                              |                                                 |                            |    |
| Faustovirus_180 | 199950..200699             | 250                                    | Yes                     |                                           | 448929966                                                            | GIY-YIG catalytic domain-containing endonuclease<br>Intron_gpI<br>Intron_gpI | Acanthocystis turfacea Chlorella virus GM0701.1 | 1,00E-11                   | 37 |

23

24 **Supplemental Table S1.** (continued)

| ORF number      | ORF coordinates            | Predicted protein length (amino acids) | Detection by proteomics | GenBank identifier of the first BLAST hit | Identity of the first BLAST hit in GenBank_nr (completed annotation) | Organism corresponding to the first BLAST hit in GenBank_nr              | e-value                              | Percentage of identity (%) |    |
|-----------------|----------------------------|----------------------------------------|-------------------------|-------------------------------------------|----------------------------------------------------------------------|--------------------------------------------------------------------------|--------------------------------------|----------------------------|----|
| 25              |                            |                                        |                         |                                           |                                                                      |                                                                          |                                      |                            |    |
| Faustovirus_183 | complement(201200..201469) | 90                                     | Yes                     |                                           |                                                                      |                                                                          |                                      |                            |    |
| Faustovirus_184 | complement(201977..202285) | 103                                    |                         |                                           | Intron_gpI                                                           |                                                                          |                                      |                            |    |
| Faustovirus_186 | complement(203193..204050) | 286                                    |                         |                                           |                                                                      |                                                                          |                                      |                            |    |
| Faustovirus_187 | complement(204338..204706) | 123                                    |                         |                                           | Intron_gpI                                                           |                                                                          |                                      |                            |    |
| Faustovirus_189 | 204992..205258             | 89                                     | Yes                     | *                                         |                                                                      |                                                                          |                                      |                            |    |
| Faustovirus_191 | 206117..206521             | 135                                    | Yes                     | *                                         | 566016778                                                            | Protein F443_14731 (major capsid protein, partial)                       | Phytophthora parasitica P1569        | 1,00E-17                   | 40 |
| Faustovirus_192 | 206887..207987             | 367                                    |                         |                                           | 738879757                                                            | Hypothetical protein, partial (GIY-YIG-like endonuclease)                | Peptostreptococcaceae bacterium VA2  | 2,00E-11                   | 40 |
| Faustovirus_193 | complement(210875..211264) | 130                                    |                         |                                           |                                                                      |                                                                          |                                      |                            |    |
| Faustovirus_194 | 212187..212552             | 122                                    | Yes                     | *                                         | 570944290                                                            | Hypothetical protein F441_14586, partial (major capsid protein, partial) | Phytophthora parasitica CJ01A1       | 1,00E-07                   | 35 |
| Faustovirus_195 | 212788..213525             | 246                                    |                         |                                           | 66219837                                                             | p72 (capsid protein)                                                     | African swine fever virus            | 4,00E-04                   | 43 |
| Faustovirus_196 | complement(213482..214210) | 243                                    |                         |                                           |                                                                      |                                                                          |                                      |                            |    |
| Faustovirus_197 | complement(214249..215511) | 421                                    |                         |                                           | 356980056                                                            | Hypothetical protein MPWG_00045 (DUF4379 domain-containing protein)      | Micromonas pusilla virus PL1         | 9,00E-09                   | 30 |
| Faustovirus_198 | 215555..216097             | 181                                    |                         |                                           |                                                                      |                                                                          |                                      |                            |    |
| Faustovirus_199 | 216124..216921             | 266                                    | Yes                     |                                           |                                                                      |                                                                          |                                      |                            |    |
| Faustovirus_200 | 216951..217190             | 80                                     |                         |                                           |                                                                      |                                                                          |                                      |                            |    |
| Faustovirus_201 | 217299..218654             | 452                                    |                         |                                           | 441432831                                                            | T5orf172 domain-containing protein                                       | Acanthamoeba polyphaga mounouvirus   | 7,00E-08                   | 34 |
| Faustovirus_202 | 218736..219164             | 143                                    |                         |                                           |                                                                      |                                                                          |                                      |                            |    |
| Faustovirus_203 | complement(219214..220047) | 278                                    |                         |                                           | 310831525                                                            | Hypothetical protein crov535                                             | Cafeteria roenbergensis virus BV-PW1 | 2,00E-16                   | 29 |
| Faustovirus_204 | 220116..220508             | 131                                    |                         |                                           |                                                                      |                                                                          |                                      |                            |    |
| Faustovirus_205 | 220609..221826             | 406                                    |                         |                                           |                                                                      |                                                                          |                                      |                            |    |
| Faustovirus_206 | 221904..222365             | 154                                    |                         |                                           |                                                                      |                                                                          |                                      |                            |    |
| Faustovirus_207 | 222445..222981             | 179                                    |                         |                                           |                                                                      |                                                                          |                                      |                            |    |
| Faustovirus_208 | 223402..227412             | 1337                                   | Yes                     |                                           | 322510888                                                            | Putative site-specific DNA-methyltransferase                             | Organic Lake phycodnavirus 2         | 3,00E-170                  | 31 |
| Faustovirus_209 | complement(227441..227953) | 171                                    | Yes                     |                                           |                                                                      |                                                                          |                                      |                            |    |

26



27 **Supplemental Table S1.** (continued)

| ORF number      | ORF coordinates            | Predicted protein length (amino acids) | Detection by proteomics | GenBank identifier of the first BLAST hit | Identity of the first BLAST hit in GenBank_nr (completed annotation) | Organism corresponding to the first BLAST hit in GenBank_nr | e-value  | Percentage of identity (%) |
|-----------------|----------------------------|----------------------------------------|-------------------------|-------------------------------------------|----------------------------------------------------------------------|-------------------------------------------------------------|----------|----------------------------|
| 28              |                            |                                        |                         |                                           |                                                                      |                                                             |          |                            |
| Faustovirus_210 | 228058..228558             | 167                                    | Yes                     |                                           |                                                                      |                                                             |          |                            |
| Faustovirus_211 | complement(228579..228986) | 136                                    |                         | 547892309                                 | UvrB/UvrC protein                                                    | Clostridium sp. CAG:465                                     | 8,00E-04 | 33                         |
| Faustovirus_212 | 229086..229904             | 273                                    |                         |                                           |                                                                      |                                                             |          |                            |
| Faustovirus_213 | 229997..230578             | 194                                    |                         |                                           |                                                                      |                                                             |          |                            |
| Faustovirus_214 | complement(230616..231185) | 190                                    |                         |                                           |                                                                      |                                                             |          |                            |
| Faustovirus_215 | 231317..231763             | 149                                    |                         |                                           |                                                                      |                                                             |          |                            |
| Faustovirus_216 | 231816..232646             | 277                                    |                         |                                           |                                                                      |                                                             |          |                            |
| Faustovirus_217 | 232709..233341             | 211                                    |                         |                                           |                                                                      |                                                             |          |                            |
| Faustovirus_218 | complement(233367..233852) | 162                                    | Yes *                   | 648484013                                 | Hypothetical protein                                                 | Methylobacterium sp. 88A                                    | 4,00E-25 | 53                         |
| Faustovirus_219 | complement(233891..234100) | 70                                     | Yes                     | 356980016                                 | Hypothetical protein MPWG_00005                                      | Micromonas pusilla virus PL1                                | 7,00E-04 | 35                         |
| Faustovirus_220 | complement(234149..234835) | 229                                    |                         |                                           |                                                                      |                                                             |          |                            |
| Faustovirus_221 | 235180..235767             | 196                                    |                         |                                           |                                                                      |                                                             |          |                            |
| Faustovirus_222 | complement(235811..236092) | 94                                     |                         |                                           |                                                                      |                                                             |          |                            |
| Faustovirus_223 | 236173..237027             | 285                                    |                         |                                           |                                                                      |                                                             |          |                            |
| Faustovirus_224 | 237081..237572             | 164                                    |                         |                                           |                                                                      |                                                             |          |                            |
| Faustovirus_225 | complement(237585..238484) | 300                                    |                         |                                           |                                                                      |                                                             |          |                            |
| Faustovirus_226 | 238856..240004             | 383                                    |                         |                                           |                                                                      |                                                             |          |                            |
| Faustovirus_227 | 240432..241232             | 267                                    |                         |                                           |                                                                      |                                                             |          |                            |
| Faustovirus_228 | 241537..242082             | 182                                    |                         |                                           |                                                                      |                                                             |          |                            |
| Faustovirus_229 | complement(242123..242683) | 187                                    |                         |                                           |                                                                      |                                                             |          |                            |
| Faustovirus_230 | complement(242806..243312) | 169                                    | Yes *                   | 470376935                                 | TM2 domain containing protein                                        | Acanthamoeba castellanii str. Neff                          | 2,00E-03 | 36                         |
| Faustovirus_231 | complement(243560..244630) | 357                                    |                         |                                           |                                                                      |                                                             |          |                            |
| Faustovirus_232 | 245286..246041             | 252                                    |                         |                                           |                                                                      |                                                             |          |                            |
| Faustovirus_233 | complement(246063..246539) | 159                                    | Yes *                   |                                           |                                                                      |                                                             |          |                            |
| Faustovirus_234 | 246616..248019             | 468                                    |                         | 737995869                                 | Histidinol phosphate aminotransferase                                | Bryobacter aggregatus                                       | 5,00E-33 | 28                         |
| Faustovirus_235 | 248420..248986             | 189                                    | Yes                     |                                           |                                                                      |                                                             |          |                            |
| Faustovirus_236 | 249037..249564             | 176                                    |                         |                                           |                                                                      |                                                             |          |                            |
| Faustovirus_237 | 249640..250185             | 182                                    |                         | 497473819                                 | DNA polymerase I                                                     | Lyngbya sp. PCC 8106                                        | 2,00E-06 | 31                         |
| Faustovirus_238 | complement(250234..250692) | 153                                    |                         | 497723327                                 | Hypothetical protein, partial (Swarming motility protein YbiA)       | Gemmata obscuriglobus                                       | 3,00E-53 | 57                         |

29

30 **Supplemental Table S1.** (continued)

| ORF number      | ORF coordinates            | Predicted protein length (amino acids) | Detection by proteomics | GenBank identifier of the first BLAST hit | Identity of the first BLAST hit in GenBank_nr (completed annotation) | Organism corresponding to the first BLAST hit in GenBank_nr               | e-value                                         | Pourcentage of identity (%) |    |
|-----------------|----------------------------|----------------------------------------|-------------------------|-------------------------------------------|----------------------------------------------------------------------|---------------------------------------------------------------------------|-------------------------------------------------|-----------------------------|----|
| 31              |                            |                                        |                         |                                           |                                                                      |                                                                           |                                                 |                             |    |
| Faustovirus_239 | complement(250755..251360) | 202                                    |                         |                                           |                                                                      |                                                                           |                                                 |                             |    |
| Faustovirus_240 | 251460..252377             | 306                                    |                         |                                           |                                                                      |                                                                           |                                                 |                             |    |
| Faustovirus_241 | 252447..253202             | 252                                    |                         |                                           |                                                                      |                                                                           |                                                 |                             |    |
| Faustovirus_242 | complement(253191..253868) | 226                                    |                         |                                           |                                                                      |                                                                           |                                                 |                             |    |
| Faustovirus_243 | complement(253940..254476) | 179                                    | Yes                     |                                           |                                                                      |                                                                           |                                                 |                             |    |
| Faustovirus_244 | 254586..255107             | 174                                    |                         |                                           |                                                                      |                                                                           |                                                 |                             |    |
| Faustovirus_245 | 255138..255665             | 176                                    |                         |                                           |                                                                      |                                                                           |                                                 |                             |    |
| Faustovirus_246 | complement(255677..256576) | 300                                    | Yes                     | *                                         | 11931733                                                             | Iridoviral protein homologue                                              | Diadromus pulchellus ascovirus 4a               | 7,00E-06                    | 26 |
| Faustovirus_247 | 256643..256984             | 114                                    | Yes                     | *                                         |                                                                      |                                                                           |                                                 |                             |    |
| Faustovirus_248 | 257051..257734             | 228                                    |                         |                                           |                                                                      |                                                                           |                                                 |                             |    |
| Faustovirus_249 | 257813..258751             | 313                                    |                         |                                           |                                                                      |                                                                           |                                                 |                             |    |
| Faustovirus_250 | 258904..259440             | 179                                    |                         |                                           |                                                                      |                                                                           |                                                 |                             |    |
| Faustovirus_251 | complement(259492..259815) | 108                                    |                         |                                           |                                                                      |                                                                           |                                                 |                             |    |
| Faustovirus_252 | complement(259829..260284) | 152                                    |                         |                                           |                                                                      |                                                                           |                                                 |                             |    |
| Faustovirus_253 | complement(260565..261296) | 244                                    |                         |                                           |                                                                      |                                                                           |                                                 |                             |    |
| Faustovirus_254 | 261661..262146             | 162                                    | Yes                     |                                           |                                                                      |                                                                           |                                                 |                             |    |
| Faustovirus_255 | 262227..263333             | 369                                    |                         |                                           |                                                                      |                                                                           |                                                 |                             |    |
| Faustovirus_256 | complement(263566..265050) | 495                                    |                         |                                           | 302836439                                                            | Hypothetical protein VOLCADRAFT_90158 (ankyrin repeat-containing protein) | Volvox carteri f. nagariensis                   | 9,00E-05                    | 34 |
| Faustovirus_257 | complement(265256..266065) | 270                                    |                         |                                           | 470516696                                                            | Ubiquitin domain containing protein                                       | Acanthamoeba castellanii str. Neff              | 9,00E-33                    | 32 |
| Faustovirus_258 | 266130..266828             | 233                                    |                         |                                           |                                                                      |                                                                           |                                                 |                             |    |
| Faustovirus_259 | 266874..267365             | 164                                    |                         |                                           |                                                                      |                                                                           |                                                 |                             |    |
| Faustovirus_260 | complement(267412..267996) | 195                                    | Yes                     | *                                         |                                                                      |                                                                           |                                                 |                             |    |
| Faustovirus_261 | 268647..269222             | 192                                    |                         |                                           |                                                                      |                                                                           |                                                 |                             |    |
| Faustovirus_262 | 269285..270109             | 275                                    |                         |                                           |                                                                      |                                                                           |                                                 |                             |    |
| Faustovirus_263 | 270206..271075             | 290                                    |                         |                                           |                                                                      |                                                                           |                                                 |                             |    |
| Faustovirus_264 | 271123..271476             | 118                                    |                         |                                           |                                                                      |                                                                           |                                                 |                             |    |
| Faustovirus_265 | 271530..272291             | 254                                    |                         |                                           |                                                                      |                                                                           |                                                 |                             |    |
| Faustovirus_266 | complement(272355..273554) | 400                                    | Yes                     | *                                         | 448932251                                                            | Amino oxidase                                                             | Acanthocystis turfacea Chlorella virus MN0810.1 | 1,00E-39                    | 29 |

32

33 **Supplemental Table S1.** (continued)

| ORF number      | ORF coordinates            | Predicted protein length (amino acids) | Detection by proteomics | GenBank identifier of the first BLAST hit | Identity of the first BLAST hit in GenBank_nr (completed annotation) | Organism corresponding to the first BLAST hit in GenBank_nr                               | e-value                                                           | Percentage of identity (%) |    |
|-----------------|----------------------------|----------------------------------------|-------------------------|-------------------------------------------|----------------------------------------------------------------------|-------------------------------------------------------------------------------------------|-------------------------------------------------------------------|----------------------------|----|
| 34              |                            |                                        |                         |                                           |                                                                      |                                                                                           |                                                                   |                            |    |
| Faustovirus_267 | 273858..274658             | 267                                    |                         |                                           |                                                                      |                                                                                           |                                                                   |                            |    |
| Faustovirus_268 | 274755..275126             | 124                                    | Yes                     |                                           |                                                                      |                                                                                           |                                                                   |                            |    |
| Faustovirus_269 | complement(275355..275945) | 197                                    | Yes                     | *                                         |                                                                      |                                                                                           |                                                                   |                            |    |
| Faustovirus_270 | 276025..276609             | 195                                    | Yes                     |                                           | 229891867                                                            | Uncharacterized protein B175L (A1L transcription factor/late transcription factor VLTF-2) | African swine fever virus tick/South Africa/Pretoriuskop Pr4/1996 | 5,00E-10                   | 29 |
| Faustovirus_271 | complement(276628..277404) | 259                                    |                         |                                           |                                                                      |                                                                                           |                                                                   |                            |    |
| Faustovirus_272 | 277506..278621             | 372                                    | Yes                     | *                                         | 162849294                                                            | pB407L                                                                                    | African swine fever virus Benin 97/1                              | 2,00E-22                   | 26 |
| Faustovirus_273 | 278946..280325             | 460                                    |                         |                                           | 229891906                                                            | Uncharacterized protein B263R                                                             | African swine fever virus pig/Kenya/KEN-50/1950                   | 4,00E-03                   | 37 |
| Faustovirus_274 | complement(280368..280646) | 93                                     | Yes                     |                                           |                                                                      |                                                                                           |                                                                   |                            |    |
| Faustovirus_275 | complement(280709..284827) | 1373                                   | Yes                     | *                                         | 229891832                                                            | Uncharacterized protein G1340L (putative early transcription factor large subunit VETF-L) | African swine fever virus warthog/Namibia/Wart80/1980             | 3,00E-97                   | 25 |
| Faustovirus_276 | 284934..285602             | 223                                    | Yes                     | *                                         | 508182059                                                            | Metal-dependent hydrolase                                                                 | Phaeocystis globosa virus                                         | 8,00E-26                   | 40 |
| Faustovirus_277 | 285653..286111             | 153                                    |                         |                                           |                                                                      |                                                                                           |                                                                   |                            |    |
| Faustovirus_278 | complement(286208..286729) | 174                                    | Yes                     | *                                         |                                                                      |                                                                                           |                                                                   |                            |    |
| Faustovirus_279 | 286810..287385             | 192                                    |                         |                                           | 657695079                                                            | Hypothetical protein (MORN repeat-containing protein)                                     | Fusobacterium hwasookii                                           | 1,00E-16                   | 32 |
| Faustovirus_280 | 287459..287965             | 169                                    | Yes                     |                                           |                                                                      |                                                                                           |                                                                   |                            |    |
| Faustovirus_281 | 288029..288694             | 222                                    |                         |                                           |                                                                      |                                                                                           |                                                                   |                            |    |
| Faustovirus_282 | 288768..289232             | 155                                    |                         |                                           |                                                                      |                                                                                           |                                                                   |                            |    |
| Faustovirus_283 | 289659..294128             | 1490                                   |                         |                                           | 552912589                                                            | Protein GLOINDRAFT_10982 (DNA polymerase elongation subunit family B)                     | Rhizophagus irregularis DAOM 181602                               | 5,00E-62                   | 34 |
| Faustovirus_284 | 294240..294800             | 187                                    | Yes                     | *                                         |                                                                      |                                                                                           |                                                                   |                            |    |
| Faustovirus_285 | complement(294866..295522) | 219                                    |                         |                                           |                                                                      |                                                                                           |                                                                   |                            |    |
| Faustovirus_286 | complement(295573..296454) | 294                                    |                         |                                           |                                                                      |                                                                                           |                                                                   |                            |    |
| Faustovirus_287 | complement(296600..296749) | 50                                     | Yes                     | *                                         | 735019541                                                            | Hypothetical protein QT04_C0005G0003/aspartic peptidase                                   | archaeon GW2011_AR11                                              | 2,00E-08                   | 67 |
| Faustovirus_288 | complement(296845..297402) | 186                                    |                         |                                           | 518991882                                                            | Hypothetical protein (MORN repeat-containing protein)                                     | Verrucomicrobia bacterium SCGC AAA164-E04                         | 4,00E-07                   | 27 |
| Faustovirus_289 | 297454..298071             | 206                                    |                         |                                           |                                                                      |                                                                                           |                                                                   |                            |    |
| Faustovirus_290 | complement(298093..299175) | 361                                    | Yes                     |                                           | 145532086                                                            | Hypothetical protein (Ubiquitin carboxyl-terminal hydrolase)                              | Paramecium tetraurelia strain d4-2                                | 4,00E-07                   | 33 |

35

36 **Supplemental Table S1.** (continued)

| ORF number      | ORF coordinates            | Predicted protein length (amino acids) | Detection by proteomics | GenBank identifier of the first BLAST hit | Identity of the first BLAST hit in GenBank_nr (completed annotation) | Organism corresponding to the first BLAST hit in GenBank_nr       | e-value   | Percentage of identity (%) |
|-----------------|----------------------------|----------------------------------------|-------------------------|-------------------------------------------|----------------------------------------------------------------------|-------------------------------------------------------------------|-----------|----------------------------|
| 37              |                            |                                        |                         |                                           |                                                                      |                                                                   |           |                            |
| Faustovirus_291 | 299351..300547             | 399                                    | Yes *                   |                                           |                                                                      |                                                                   |           |                            |
| Faustovirus_292 | complement(300651..309590) | 2980                                   |                         | 229891460                                 | 220 kDa polyprotein                                                  | African swine fever virus Malawi LIL 20/1                         | 1,00E-141 | 27                         |
| Faustovirus_293 | 309773..311482             | 570                                    | Yes *                   | 723633433                                 | 60 kDa polyprotein                                                   | African swine fever virus                                         | 1,00E-14  | 22                         |
| Faustovirus_294 | complement(311623..312087) | 155                                    |                         |                                           |                                                                      |                                                                   |           |                            |
| Faustovirus_295 | 312561..312169             | 131                                    |                         |                                           |                                                                      |                                                                   |           |                            |
| Faustovirus_296 | 312680..312898             | 73                                     | Yes *                   |                                           |                                                                      |                                                                   |           |                            |
| Faustovirus_297 | complement(312921..314066) | 382                                    | Yes *                   | 527060079                                 | Fibrillarin-like rRNA methylase                                      | Cyclobacterium qasimii                                            | 2,00E-05  | 27                         |
| Faustovirus_298 | 314486..315406             | 307                                    | Yes                     |                                           |                                                                      |                                                                   |           |                            |
| Faustovirus_299 | complement(315456..315905) | 150                                    |                         | 503793157                                 | N-acetyltransferase ( ribosomal-protein-alanine acetyltransferase)   | Pyrolobus fumarii                                                 | 3,00E-30  | 45                         |
| Faustovirus_300 | 316181..316492             | 104                                    | Yes *                   |                                           |                                                                      |                                                                   |           |                            |
| Faustovirus_301 | complement(316489..318111) | 541                                    |                         |                                           |                                                                      |                                                                   |           |                            |
| Faustovirus_302 | complement(318433..318714) | 94                                     | Yes *                   |                                           |                                                                      |                                                                   |           |                            |
| Faustovirus_303 | complement(318815..319165) | 117                                    | Yes *                   | 673042869                                 | Hypothetical protein H310_10725 (MORN repeat-containing protein)     | Aphanomyces invadans                                              | 4,00E-06  | 30                         |
| Faustovirus_304 | 319269..320246             | 326                                    |                         |                                           |                                                                      |                                                                   |           |                            |
| Faustovirus_305 | 320305..321390             | 362                                    |                         | 496966979                                 | Phosphatidylinositol-4-phosphate 5-kinase                            | Fusobacterium sp. oral taxon 370                                  | 4,00E-06  | 25                         |
| Faustovirus_306 | complement(321447..325772) | 1442                                   | Yes *                   | 229891560                                 | Probable DNA-directed RNA polymerase subunit 1 homolog               | African swine fever virus tick/South Africa/Pretoriuskop Pr4/1996 | 0,00E+00  | 36                         |
| Faustovirus_307 | 326004..326333             | 110                                    |                         |                                           |                                                                      |                                                                   |           |                            |
| Faustovirus_308 | 326404..326985             | 194                                    | Yes *                   |                                           |                                                                      |                                                                   |           |                            |
| Faustovirus_309 | complement(327007..327849) | 281                                    |                         |                                           |                                                                      |                                                                   |           |                            |
| Faustovirus_310 | 328182..328685             | 168                                    |                         |                                           |                                                                      |                                                                   |           |                            |
| Faustovirus_311 | 328797..329648             | 284                                    | Yes *                   |                                           |                                                                      |                                                                   |           |                            |
| Faustovirus_312 | 330003..332366             | 788                                    |                         |                                           |                                                                      |                                                                   |           |                            |
| Faustovirus_313 | complement(332363..333865) | 501                                    |                         | 568035652                                 | Hypothetical protein L914_19448                                      | Phytophthora parasitica                                           | 2,00E-28  | 29                         |
| Faustovirus_314 | 334256..335644             | 463                                    | Yes *                   | 229485343                                 | DNA ligase                                                           | African swine fever virus pig/Kenya/KEN-50/1950                   | 5,00E-61  | 34                         |
| Faustovirus_315 | 336010..336387             | 126                                    |                         |                                           |                                                                      |                                                                   |           |                            |

38

39 **Supplemental Table S1.** (continued)

| ORF number      | ORF coordinates            | Predicted protein length (amino acids) | Detection by proteomics | GenBank identifier of the first BLAST hit | Identity of the first BLAST hit in GenBank_nr (completed annotation) | Organism corresponding to the first BLAST hit in GenBank_nr | e-value   | Percentage of identity (%) |
|-----------------|----------------------------|----------------------------------------|-------------------------|-------------------------------------------|----------------------------------------------------------------------|-------------------------------------------------------------|-----------|----------------------------|
| 40              |                            |                                        |                         |                                           |                                                                      |                                                             |           |                            |
| Faustovirus_316 | 336494..336940             | 149                                    | Yes *                   | 472342598                                 | Hypothetical protein MPVG_00037                                      | Micromonas pusilla virus 12T                                | 1,00E-03  | 27                         |
| Faustovirus_317 | complement(337321..338631) | 437                                    |                         |                                           |                                                                      |                                                             |           |                            |
| Faustovirus_318 | complement(338744..339505) | 254                                    |                         | 327409766                                 | Putative deoxynucleotide monophosphate kinase                        | Lausannevirus                                               | 4,00E-08  | 29                         |
| Faustovirus_319 | 339946..340968             | 341                                    |                         |                                           |                                                                      |                                                             |           |                            |
| Faustovirus_320 | complement(341120..343792) | 891                                    | Yes *                   | 229890400                                 | Probable mRNA-capping enzyme (mRNA guanylyltransferase)              | African swine fever virus pig/Kenya/KEN-50/1950             | 2,00E-104 | 31                         |
| Faustovirus_321 | 343902..344282             | 127                                    |                         |                                           |                                                                      |                                                             |           |                            |
| Faustovirus_322 | 344326..344625             | 100                                    |                         |                                           |                                                                      |                                                             |           |                            |
| Faustovirus_323 | 344669..345067             | 133                                    |                         |                                           |                                                                      |                                                             |           |                            |
| Faustovirus_324 | 345197..345871             | 225                                    |                         |                                           |                                                                      |                                                             |           |                            |
| Faustovirus_325 | 345964..346338             | 125                                    | Yes                     |                                           |                                                                      |                                                             |           |                            |
| Faustovirus_326 | 346402..346776             | 125                                    |                         |                                           |                                                                      |                                                             |           |                            |
| Faustovirus_327 | 346891..347385             | 165                                    |                         |                                           |                                                                      |                                                             |           |                            |
| Faustovirus_328 | 347452..347799             | 116                                    |                         |                                           |                                                                      |                                                             |           |                            |
| Faustovirus_329 | 347858..348232             | 125                                    |                         |                                           |                                                                      |                                                             |           |                            |
| Faustovirus_330 | 348338..348772             | 145                                    |                         |                                           |                                                                      |                                                             |           |                            |
| Faustovirus_331 | 349122..349682             | 187                                    |                         |                                           |                                                                      |                                                             |           |                            |
| Faustovirus_332 | 349747..350190             | 148                                    |                         |                                           |                                                                      |                                                             |           |                            |
| Faustovirus_333 | 350243..350692             | 150                                    | Yes                     |                                           |                                                                      |                                                             |           |                            |
| Faustovirus_334 | 350776..351195             | 140                                    |                         |                                           |                                                                      |                                                             |           |                            |
| Faustovirus_335 | 351299..351751             | 151                                    |                         |                                           |                                                                      |                                                             |           |                            |
| Faustovirus_336 | 351814..352230             | 139                                    |                         |                                           |                                                                      |                                                             |           |                            |
| Faustovirus_337 | complement(352289..353710) | 474                                    | Yes *                   |                                           |                                                                      |                                                             |           |                            |
| Faustovirus_338 | complement(353800..354540) | 247                                    |                         |                                           |                                                                      |                                                             |           |                            |
| Faustovirus_339 | complement(354527..355189) | 221                                    | Yes                     |                                           |                                                                      |                                                             |           |                            |
| Faustovirus_340 | complement(355261..356115) | 285                                    |                         |                                           |                                                                      |                                                             |           |                            |
| Faustovirus_341 | 356222..357184             | 321                                    | Yes *                   | 516676352                                 | Hypothetical protein (DNA polymerase family X )                      | Marine Group II euryarchaeote SCGC AB-629-J06               | 5,00E-41  | 35                         |
| Faustovirus_342 | complement(357192..358499) | 436                                    |                         |                                           |                                                                      |                                                             |           |                            |

41

42 **Supplemental Table S1.** (continued)

| ORF number      | ORF coordinates            | Predicted protein length (amino acids) | Detection by proteomics | GenBank identifier of the first BLAST hit | Identity of the first BLAST hit in GenBank_nr (completed annotation)           | Organism corresponding to the first BLAST hit in GenBank_nr | e-value  | Percentage of identity (%) |
|-----------------|----------------------------|----------------------------------------|-------------------------|-------------------------------------------|--------------------------------------------------------------------------------|-------------------------------------------------------------|----------|----------------------------|
| 43              |                            |                                        |                         |                                           |                                                                                |                                                             |          |                            |
| Faustovirus_343 | 358587..359762             | 392                                    | Yes *                   | 157953925                                 | Hypothetical protein AR158_C735R (F10-like kinase )                            | Paramecium bursaria Chlorella virus AR158                   | 1,00E-07 | 36                         |
| Faustovirus_344 | 359769..360095             | 109                                    | Yes *                   |                                           |                                                                                |                                                             |          |                            |
| Faustovirus_345 | 360496..361686             | 397                                    |                         |                                           |                                                                                |                                                             |          |                            |
| Faustovirus_346 | complement(361740..362330) | 197                                    |                         | 663506229                                 | Transcription elongation factor TFIIS/Cofactor of enhancer-binding protein Sp1 | uncultured marine group II/III euryarchaeote AD1000_88_G11  | 4,00E-18 | 31                         |
| Faustovirus_347 | complement(362445..363662) | 406                                    | Yes                     |                                           |                                                                                |                                                             |          |                            |
| Faustovirus_348 | complement(363813..364706) | 298                                    | Yes *                   | 303398818                                 | EP296R (AP (apurinic) endonuclease family 2)                                   | African swine fever virus Georgia 2007/1                    | 2,00E-27 | 31                         |
| Faustovirus_349 | complement(364723..365283) | 187                                    |                         |                                           |                                                                                |                                                             |          |                            |
| Faustovirus_350 | complement(365710..367161) | 484                                    | Yes                     | 303398807                                 | QP509L (DNA or RNA helicases of superfamily II)                                | African swine fever virus Georgia 2007/1                    | 1,00E-33 | 27                         |
| Faustovirus_351 | 367234..367725             | 164                                    |                         |                                           |                                                                                |                                                             |          |                            |
| Faustovirus_352 | 367898..369259             | 454                                    |                         |                                           |                                                                                |                                                             |          |                            |
| Faustovirus_353 | complement(369853..369993) | 47                                     | Yes *                   |                                           |                                                                                |                                                             |          |                            |
| Faustovirus_354 | complement(370074..370232) | 53                                     | Yes *                   |                                           |                                                                                |                                                             |          |                            |
| Faustovirus_355 | complement(370327..371271) | 315                                    | Yes *                   | 229892042                                 | Cysteine protease S273R                                                        | African swine fever virus pig/Kenya/KEN-50/1950             | 4,00E-41 | 33                         |
| Faustovirus_356 | 371361..372116             | 252                                    | Yes *                   |                                           |                                                                                |                                                             |          |                            |
| Faustovirus_357 | 372146..372304             | 53                                     | Yes *                   |                                           |                                                                                |                                                             |          |                            |
| Faustovirus_358 | 372480..372845             | 122                                    | Yes *                   |                                           |                                                                                |                                                             |          |                            |
| Faustovirus_359 | complement(373112..374095) | 328                                    |                         | 9628234                                   | Proliferating cell nuclear antigen-like protein                                | African swine fever virus                                   | 4,00E-27 | 26                         |
| Faustovirus_360 | complement(374434..376137) | 568                                    | Yes *                   |                                           |                                                                                |                                                             |          |                            |
| Faustovirus_361 | 376311..377024             | 238                                    | Yes *                   |                                           |                                                                                |                                                             |          |                            |
| Faustovirus_362 | 377364..378638             | 425                                    | Yes *                   |                                           |                                                                                |                                                             |          |                            |
| Faustovirus_363 | complement(378714..379103) | 130                                    |                         |                                           |                                                                                |                                                             |          |                            |
| Faustovirus_364 | complement(379180..380523) | 448                                    | Yes *                   | 740198580                                 | Cysteine desulfurase                                                           | Thermomicrobiales bacterium KI4                             | 6,00E-52 | 32                         |
| Faustovirus_365 | complement(380629..382782) | 718                                    | Yes *                   | 284504412                                 | Zinc finger protein                                                            | Marseillevirus marseillevirus                               | 2,00E-16 | 21                         |
| Faustovirus_366 | complement(382974..384323) | 450                                    |                         | 655382372                                 | Uracil-DNA glycosylase                                                         | Terrimonas ferruginea                                       | 1,00E-35 | 39                         |
| Faustovirus_367 | 384413..384649             | 79                                     | Yes *                   |                                           |                                                                                |                                                             |          |                            |
| Faustovirus_368 | complement(384653..385360) | 236                                    |                         |                                           |                                                                                |                                                             |          |                            |

44

45 **Supplemental Table S1.** (continued)

| ORF number      | ORF coordinates            | Predicted protein length (amino acids) | Detection by proteomics | GenBank identifier of the first BLAST hit | Identity of the first BLAST hit in GenBank_nr (completed annotation) | Organism corresponding to the first BLAST hit in GenBank_nr | e-value   | Percentage of identity (%) |
|-----------------|----------------------------|----------------------------------------|-------------------------|-------------------------------------------|----------------------------------------------------------------------|-------------------------------------------------------------|-----------|----------------------------|
| 46              |                            |                                        |                         |                                           |                                                                      |                                                             |           |                            |
| Faustovirus_369 | complement(385412..386536) | 375                                    | Yes *                   | 751748632                                 | OIDMADRAFT_44370 ( thymidylate synthase)                             | Oidiodendron maius Zn                                       | 3,00E-77  | 45                         |
| Faustovirus_370 | complement(386624..387454) | 277                                    |                         |                                           |                                                                      |                                                             |           |                            |
| Faustovirus_371 | complement(387744..388970) | 409                                    | Yes *                   |                                           |                                                                      |                                                             |           |                            |
| Faustovirus_372 | complement(389061..389870) | 270                                    | Yes                     | 550986136                                 | Hypothetical protein                                                 | Thalassospira lucentensis                                   | 3,00E-04  | 31                         |
| Faustovirus_373 | 389945..390862             | 306                                    |                         | 447031585                                 | Patatin (Patatin phospholipase)                                      | Bacillus thuringiensis                                      | 3,00E-48  | 33                         |
| Faustovirus_374 | complement(390882..392312) | 477                                    | Yes *                   | 303398740                                 | EP424R (FtsJ-like methyltransferase)                                 | African swine fever virus Georgia 2007/1                    | 1,00E-40  | 33                         |
| Faustovirus_375 | 392369..392770             | 134                                    | Yes                     |                                           |                                                                      |                                                             |           |                            |
| Faustovirus_376 | 392846..393907             | 354                                    | Yes *                   | 552924301                                 | Hypothetical protein GLOINDRAFT_84836                                | Rhizophagus irregularis DAOM 181602                         | 2,00E-33  | 29                         |
| Faustovirus_377 | complement(394257..394718) | 154                                    | Yes                     |                                           |                                                                      |                                                             |           |                            |
| Faustovirus_378 | 394835..395611             | 259                                    | Yes *                   |                                           |                                                                      |                                                             |           |                            |
| Faustovirus_379 | 395887..396429             | 181                                    |                         |                                           |                                                                      |                                                             |           |                            |
| Faustovirus_380 | 396486..397025             | 180                                    |                         |                                           |                                                                      |                                                             |           |                            |
| Faustovirus_381 | 397081..397746             | 222                                    |                         |                                           |                                                                      |                                                             |           |                            |
| Faustovirus_382 | 398085..399329             | 415                                    |                         | 493386218                                 | Hypothetical protein (MORN repeat-containing protein)                | Parachlamydia acanthamoebae                                 | 4,00E-19  | 27                         |
| Faustovirus_383 | 399411..400427             | 339                                    | Yes *                   |                                           |                                                                      |                                                             |           |                            |
| Faustovirus_384 | 400474..401193             | 240                                    |                         | 696306976                                 | Membrane-binding protein, partial                                    | Fusobacterium nucleatum                                     | 3,00E-05  | 26                         |
| Faustovirus_385 | 401193..401900             | 236                                    |                         | 505294699                                 | Hypothetical protein (MORN repeat-containing protein)                | Polaribacter sp. MED152                                     | 8,00E-06  | 34                         |
| Faustovirus_386 | 401962..402687             | 242                                    |                         | 493694477                                 | Hypothetical protein (MORN repeat-containing protein)                | Photobacterium sp. SKA34                                    | 6,00E-08  | 36                         |
| Faustovirus_387 | complement(402698..405304) | 869                                    | Yes *                   | 82059328                                  | Putative ATP-dependent RNA helicase Q706L                            | African swine fever virus Malawi LIL 20/1                   | 2,00E-48  | 32                         |
| Faustovirus_388 | 405678..407015             | 446                                    |                         | 534481265                                 | Hypothetical protein HRAG_00328 (MORN repeat-containing protein)     | Helicobacter bilis ATCC 43879                               | 2,00E-29  | 28                         |
| Faustovirus_389 | complement(407084..407956) | 291                                    | Yes *                   |                                           |                                                                      |                                                             |           |                            |
| Faustovirus_390 | complement(408307..409422) | 372                                    | Yes *                   | 589910733                                 | DNA-directed RNA polymerase subunit D                                | Thermococcus nautili                                        | 7,00E-04  | 33                         |
| Faustovirus_391 | complement(409753..411099) | 449                                    | Yes *                   |                                           |                                                                      |                                                             |           |                            |
| Faustovirus_392 | complement(411197..414901) | 1235                                   | Yes                     | 303398797                                 | P1192R (DNA topoisomerase II)                                        | African swine fever virus Georgia 2007/1                    | 9,00E-131 | 29                         |
| Faustovirus_393 | complement(415386..415604) | 73                                     | Yes *                   |                                           |                                                                      |                                                             |           |                            |

47

48 **Supplemental Table S1.** (continued)

| ORF number      | ORF coordinates            | Predicted protein length (amino acids) | Detection by proteomics | GenBank identifier of the first BLAST hit | Identity of the first BLAST hit in GenBank_nr (completed annotation)      | Organism corresponding to the first BLAST hit in GenBank_nr | e-value   | Percentage of identity (%) |
|-----------------|----------------------------|----------------------------------------|-------------------------|-------------------------------------------|---------------------------------------------------------------------------|-------------------------------------------------------------|-----------|----------------------------|
| 49              |                            |                                        |                         |                                           |                                                                           |                                                             |           |                            |
| Faustovirus_394 | complement(415776..416156) | 127                                    | Yes *                   |                                           |                                                                           |                                                             |           |                            |
| Faustovirus_395 | 416346..417014             | 223                                    | Yes *                   | 159118208                                 | RNA polymerase II subunit Rpb5b                                           | Giardia lamblia ATCC 50803                                  | 1,00E-12  | 29                         |
| Faustovirus_396 | complement(417044..418033) | 330                                    |                         | 9628216                                   | pD345L (YqaJ viral recombinase)                                           | African swine fever virus                                   | 2,00E-20  | 28                         |
| Faustovirus_397 | complement(418136..418378) | 81                                     | Yes *                   |                                           |                                                                           |                                                             |           |                            |
| Faustovirus_398 | 418522..419520             | 333                                    | Yes *                   | 229485368                                 | mRNA-decapping protein (Diphosphoinositol polyphosphate phosphohydrolase) | African swine fever virus pig/Kenya/KEN-50/1950             | 3,00E-34  | 35                         |
| Faustovirus_399 | complement(419564..420271) | 236                                    |                         |                                           |                                                                           |                                                             |           |                            |
| Faustovirus_400 | 420339..424886             | 1516                                   | Yes *                   | 291289549                                 | BA71V-D1133L (g10L) (unclassified DEAD/SNF2-like helicase)                | African swine fever virus E75                               | 9,00E-115 | 29                         |
| Faustovirus_401 | 425216..426265             | 350                                    | Yes *                   |                                           |                                                                           |                                                             |           |                            |
| Faustovirus_402 | 426344..426682             | 113                                    |                         |                                           |                                                                           |                                                             |           |                            |
| Faustovirus_403 | 426752..427399             | 216                                    | Yes *                   |                                           |                                                                           |                                                             |           |                            |
| Faustovirus_404 | 427474..428301             | 276                                    |                         |                                           |                                                                           |                                                             |           |                            |
| Faustovirus_405 | 428404..429852             | 483                                    | Yes *                   | 442771778                                 | Rhs family protein                                                        | uncultured bacterium A1Q1_fos_493                           | 1,00E-08  | 37                         |
| Faustovirus_406 | 429925..430773             | 283                                    |                         |                                           |                                                                           |                                                             |           |                            |
| Faustovirus_407 | 430860..431204             | 115                                    | Yes                     |                                           |                                                                           |                                                             |           |                            |
| Faustovirus_408 | complement(431272..431880) | 203                                    |                         |                                           |                                                                           |                                                             |           |                            |
| Faustovirus_409 | complement(431984..432802) | 273                                    |                         |                                           |                                                                           |                                                             |           |                            |
| Faustovirus_410 | 433196..433561             | 122                                    |                         |                                           |                                                                           |                                                             |           |                            |
| Faustovirus_411 | complement(433536..433919) | 128                                    |                         |                                           |                                                                           |                                                             |           |                            |
| Faustovirus_412 | complement(433951..434328) | 126                                    |                         |                                           |                                                                           |                                                             |           |                            |
| Faustovirus_413 | 434846..435547             | 234                                    |                         |                                           |                                                                           |                                                             |           |                            |
| Faustovirus_414 | complement(435619..436344) | 242                                    |                         |                                           |                                                                           |                                                             |           |                            |
| Faustovirus_415 | 436595..437509             | 305                                    |                         |                                           |                                                                           |                                                             |           |                            |
| Faustovirus_416 | complement(437797..438219) | 141                                    |                         |                                           |                                                                           |                                                             |           |                            |
| Faustovirus_417 | 438567..439025             | 153                                    |                         |                                           |                                                                           |                                                             |           |                            |
| Faustovirus_418 | complement(439177..439920) | 248                                    |                         |                                           |                                                                           |                                                             |           |                            |
| Faustovirus_419 | 440300..441211             | 304                                    | Yes                     |                                           |                                                                           |                                                             |           |                            |
| Faustovirus_420 | complement(441251..442012) | 254                                    |                         |                                           |                                                                           |                                                             |           |                            |
| Faustovirus_421 | complement(442147..442539) | 131                                    |                         | 516663344                                 | Hypothetical protein (MORN repeat-containing protein)                     | Porphyromonas somerae                                       | 1,00E-06  | 38                         |

50



51 **Supplemental Table S1.** (continued)

| ORF number      | ORF coordinates            | Predicted protein length (amino acids) | Detection by proteomics | GenBank identifier of the first BLAST hit | Identity of the first BLAST hit in GenBank_nr (completed annotation) | Organism corresponding to the first BLAST hit in GenBank_nr | e-value            | Percentage of identity (%) |    |
|-----------------|----------------------------|----------------------------------------|-------------------------|-------------------------------------------|----------------------------------------------------------------------|-------------------------------------------------------------|--------------------|----------------------------|----|
| 52              |                            |                                        |                         |                                           |                                                                      |                                                             |                    |                            |    |
| Faustovirus_422 | 442640..443572             | 311                                    |                         |                                           |                                                                      |                                                             |                    |                            |    |
| Faustovirus_423 | 443615..444220             | 202                                    |                         |                                           |                                                                      |                                                             |                    |                            |    |
| Faustovirus_424 | 444553..445275             | 241                                    |                         |                                           |                                                                      |                                                             |                    |                            |    |
| Faustovirus_425 | 445316..445852             | 179                                    |                         |                                           |                                                                      |                                                             |                    |                            |    |
| Faustovirus_426 | complement(445853..446278) | 142                                    |                         | 676379365                                 | Protein AURANDRAFT_20639 (Translation initiation factor SUI1)        | Aureococcus anophagefferens                                 | 9,00E-28           | 57                         |    |
| Faustovirus_427 | 446350..446940             | 197                                    | Yes                     | *                                         | 491358983                                                            | Phosphatidylinositol-4-phosphate 5-kinase                   | Helicobacter bilis | 1,00E-06                   | 32 |
| Faustovirus_428 | 446993..447556             | 188                                    |                         |                                           |                                                                      |                                                             |                    |                            |    |
| Faustovirus_429 | 447642..448109             | 156                                    |                         |                                           |                                                                      |                                                             |                    |                            |    |
| Faustovirus_430 | 448196..448762             | 189                                    |                         |                                           |                                                                      |                                                             |                    |                            |    |
| Faustovirus_431 | complement(448805..449044) | 80                                     | Yes                     | *                                         |                                                                      |                                                             |                    |                            |    |
| Faustovirus_432 | 449121..449591             | 157                                    |                         |                                           |                                                                      |                                                             |                    |                            |    |
| Faustovirus_433 | 449687..450190             | 168                                    |                         |                                           |                                                                      |                                                             |                    |                            |    |
| Faustovirus_434 | 450263..450802             | 180                                    |                         |                                           |                                                                      |                                                             |                    |                            |    |
| Faustovirus_435 | 450853..451266             | 138                                    |                         |                                           |                                                                      |                                                             |                    |                            |    |
| Faustovirus_436 | 451302..451901             | 200                                    |                         |                                           |                                                                      |                                                             |                    |                            |    |
| Faustovirus_437 | 451940..452569             | 210                                    |                         |                                           |                                                                      |                                                             |                    |                            |    |
| Faustovirus_438 | 452670..453308             | 213                                    | Yes                     |                                           |                                                                      |                                                             |                    |                            |    |
| Faustovirus_439 | 453312..454025             | 238                                    |                         | 492752400                                 | Hypothetical protein (MORN repeat-containing protein)                | Fusobacterium varium                                        | 1,00E-06           | 24                         |    |
| Faustovirus_440 | 454072..454755             | 228                                    |                         | 739520856                                 | Hypothetical protein, partial (MORN repeat-containing protein)       | Smithella                                                   | 2,00E-08           | 29                         |    |
| Faustovirus_441 | 454848..455357             | 170                                    |                         | 492752400                                 | Hypothetical protein (MORN repeat-containing protein)                | Fusobacterium varium                                        | 3,00E-07           | 35                         |    |
| Faustovirus_442 | 455411..456019             | 203                                    |                         |                                           |                                                                      |                                                             |                    |                            |    |
| Faustovirus_443 | 456085..456792             | 236                                    |                         |                                           |                                                                      |                                                             |                    |                            |    |
| Faustovirus_444 | 456841..457569             | 243                                    |                         |                                           |                                                                      |                                                             |                    |                            |    |
| Faustovirus_445 | 457631..458482             | 284                                    |                         |                                           |                                                                      |                                                             |                    |                            |    |
| Faustovirus_446 | 458548..458889             | 114                                    |                         |                                           |                                                                      |                                                             |                    |                            |    |
| Faustovirus_447 | 458968..459291             | 108                                    |                         |                                           |                                                                      |                                                             |                    |                            |    |
| Faustovirus_448 | 459391..459990             | 200                                    |                         |                                           |                                                                      |                                                             |                    |                            |    |

53

54 **Supplemental Table S1.** (*continued*)

| ORF number      | ORF coordinates | Predicted protein length (amino acids) | Detection by proteomics | GenBank identifier of the first BLAST hit | Identity of the first BLAST hit in GenBank_nr (completed annotation) | Organism corresponding to the first BLAST hit in GenBank_nr | e-value | Pourcentage of identity (%) |
|-----------------|-----------------|----------------------------------------|-------------------------|-------------------------------------------|----------------------------------------------------------------------|-------------------------------------------------------------|---------|-----------------------------|
| 55              |                 |                                        |                         |                                           |                                                                      |                                                             |         |                             |
| Faustovirus_449 | 459987..460334  | 116                                    |                         |                                           |                                                                      |                                                             |         |                             |
| Faustovirus_450 | 460447..461376  | 310                                    |                         |                                           |                                                                      |                                                             |         |                             |
| Faustovirus_451 | 461467..462033  | 189                                    |                         |                                           |                                                                      |                                                             |         |                             |
| Faustovirus_452 | 462088..462630  | 181                                    |                         |                                           |                                                                      |                                                             |         |                             |
| Faustovirus_453 | 462709..463233  | 175                                    |                         |                                           |                                                                      |                                                             |         |                             |
| Faustovirus_454 | 463275..463712  | 146                                    |                         |                                           |                                                                      |                                                             |         |                             |
| Faustovirus_455 | 463757..464218  | 154                                    |                         |                                           |                                                                      |                                                             |         |                             |
| Faustovirus_456 | 464400..465116  | 239                                    |                         |                                           |                                                                      |                                                             |         |                             |
| Faustovirus_457 | 465126..465659  | 178                                    |                         |                                           |                                                                      |                                                             |         |                             |

56

57 \* indicates that proteins were identified in at least two first dimension LC fractions.

58
